# Supplementary material for: Rabring7 Degrades c-Myc through Complex Formation with MM-1
Source: PubMed Central journal article supplement (PMC3402419; doi:10.1371/journal.pone.0041891), 2012-07-23
Supplement: pone.0041891.s001.pdf [file pone.0041891.s001.pdf]

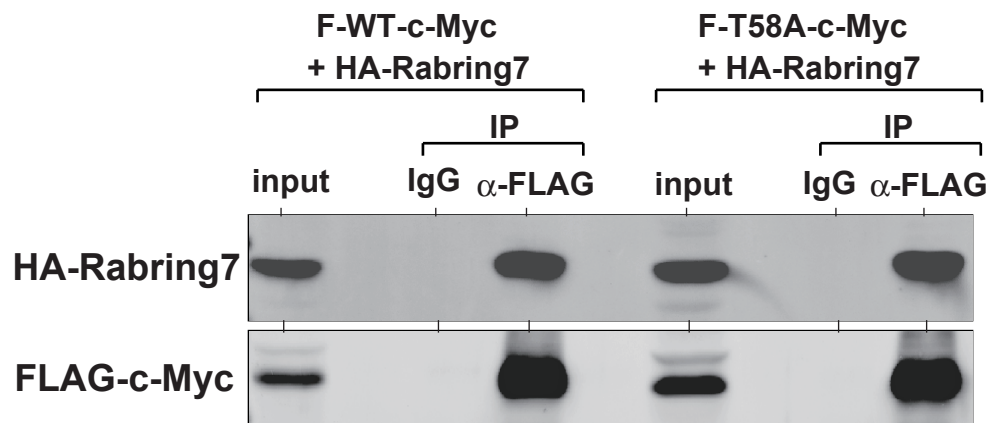

**Fig. S1**
